# Haplocheck: Phylogeny-based Contamination Detection in Mitochondrial and Whole-Genome Sequencing Studies

**Hansi Weissensteiner<sup>a</sup>, Lukas Forer<sup>a</sup>, Liane Fendt<sup>a</sup>, Azin Kheirkhah<sup>a</sup>,  
Antonio Salas<sup>b</sup>, Florian Kronenberg<sup>a</sup> and Sebastian Schoenherr<sup>a\*</sup>**

<sup>a</sup>Institute of Genetic Epidemiology, Department of Genetics and Pharmacology, Medical University of Innsbruck, 6020 Innsbruck, Austria

<sup>b</sup>Unidade de Xenética, Instituto de Ciencias Forenses (INCIFOR), Facultade de Medicina, Universidade de Santiago de Compostela, and GenPoB Research Group, Instituto de Investigaciones Sanitarias (IDIS), Hospital Clínico Universitario de Santiago (SERGAS), Galicia, Spain

\*to whom correspondence should be addressed

**Contact:**

[sebastian.schoenherr@i-med.ac.at](mailto:sebastian.schoenherr@i-med.ac.at)

## Abstract

There are many examples in the literature showing the negative impact of within-species contamination in sequencing datasets. Here, we describe haplocheck, a software tool that uses the human mitochondrial phylogeny to estimate the contamination level within samples. By analyzing wet-lab and in-silico mixtures, we show that haplocheck is able to detect contamination accurately in mitochondrial sequencing studies. We further demonstrate that haplocheck can be used as an efficient proxy for estimating the nuclear DNA contamination level and investigate the influence of the mitochondrial copy number. Haplocheck is available at <https://github.com/genepi/haplocheck>.

## Introduction

The human mitochondrial DNA (mtDNA) is an extranuclear DNA of ~16.6 kb length (Andrews et al. 1999). It is inherited exclusively through the maternal line facilitating the reconstruction of the human maternal phylogeny and female (pre-)historical demographic patterns worldwide. The strict maternal inheritance of mtDNA results in a natural grouping of sequence haplotypes into monophyletic clusters, referred to as haplogroups (Kivisild et al. 2006; Kloss-Brandstätter et al. 2011).

Furthermore, next generation sequencing (NGS) or massive parallel sequencing (MPS) enables the detection of heteroplasmy over the complete mitochondrial genome. Heteroplasmy is the occurrence of at least two different haplotypes of mtDNA in the investigated biological samples (e.g. cells or tissues). Depending on the sequencing coverage, heteroplasmic positions are reliably detectable down to the 1% variant level (Weissensteiner et al. 2016; Ye et al. 2014). In recent years, the issue on apparent heteroplasmy in mitochondrial data and data interpretation was addressed by several studies (Bandelt and Salas 2012; He et al. 2010; Ye et al. 2014; Just et al. 2014a) resulting in a comprehensive review on the quality of mtDNA data derived from sequencing studies (Just et al. 2015). It has been shown that studies massively overestimate the presence of heteroplasmy, which can often be explained by external contamination (Yao et al. 2007; Just et al. 2014b, 2015; Brandhagen et al. 2020), artificial recombination (Bandelt et al. 2004), artifacts or analysis software inconsistencies (Weissensteiner et al. 2016). Sample contamination is still a major issue in both nuclear DNA (nDNA) and mtDNA sequencing studies

that must be prevented to avoid mistakes as it occurred with Sanger sequencing studies in the past (Salas et al. 2005). Due to the accuracy and sensitivity of NGS combined with the availability of improved computational models, within-species contamination is traceable down to the 1% level in whole-genome sequencing (WGS) studies (Jun et al. 2012).

Several approaches exist to detect contamination in mtDNA sequencing studies. In a recent work (Weissensteiner et al. 2016), we showed that a contamination approach based on the co-existence of phylogenetically incompatible mitochondrial haplotypes observable as heteroplasmy is feasible as already demonstrated by others (Avital et al. 2012; Li et al. 2010, 2015). Other methods, such as a Galaxy-based approach (Dickins et al. 2014) facilitates the check for contamination by building neighbor joining trees. Mixemt (Vohr et al. 2017) incorporates the mitochondrial phylogeny and estimates the most probable haplogroup for each sequence read; the computational expensive algorithm implemented in Mixemt reveals advantages for contamination detection of several haplotypes within one sample and is independent of variant frequencies. For ancient DNA studies, schmutzi (Renaud et al. 2015) uses sequence deamination patterns and fragment length distributions to estimate contamination. Additionally, specific lab-protocols were designed for eliminating contamination, including double-barcode sequencing approaches (Yin et al. 2019).

For contamination detection within mitochondrial studies, DNA cross-contamination is often investigated (Wei et al. 2019; Ding et al. 2015; Yuan et al. 2020) by applying widely accepted software tools like VerifyBamID (Zhang et al. 2020; Jun et al. 2012). Nevertheless, it becomes apparent that a tool is missing to easily detect contamination and to distinguish it from real heteroplasmic positions in mitochondrial studies. Since mtDNA is also present hundred to several thousand-fold per cell depending on cell-type, even WGS datasets specifically targeting the autosomal genome also result in a high coverage over the mitochondrial genome. Therefore, we hypothesize that the nDNA contamination level might be estimated by looking at the mtDNA only.

In this paper, we systematically evaluate the approach of using the mtDNA phylogeny for contamination detection and present the haplocheck software, which can be used as a tool to detect contamination in NGS studies. We show on different wet-lab and in-silico data sets that haplocheck is able to accurately detect heteroplasmic positions and therefore also contamination down to 1% in mtDNA studies. By creating in-silico WGS data and reanalyzing the 1000 Genomes Project data (1000 Genomes Project Consortium et al. 2015), we further demonstrate that haplocheck can be used as an efficient proxy for estimating nDNA

contamination level and investigate the influence of the mitochondrial copy number (mtCN). Finally, we show that haplocheck helps to discover the source of contamination due to the identified haplotypes within a sample.

Overall, this work demonstrates the merits of the mitochondrial genome as an instrument for fast contamination detection in sequencing studies and provides a computational tool that takes advantage of a solid well-known mitochondrial phylogeny.

## Methods

In general, haplocheck works by identifying two mitochondrial haplotypes that arise due to the existence of heteroplasmy within a sample. Haplocheck is able to detect heteroplasmic variants down to 1% and splits them by their allele frequency (AF) level into two haplotypes (or components). The resulting major ( $AF > 0.5$ ) and minor haplotypes ( $AF \leq 0.5$ ) are classified into mitochondrial haplogroups and based on the mitochondrial phylogeny, the genetic distance between the two haplogroups is calculated. The identification of two stable haplogroups in combination with several quality criteria allows haplocheck to mark samples as contaminated. Haplocheck includes (a) an accurate homoplasmic and heteroplasmic variant calling method, (b) a robust method classifying variants into mitochondrial haplogroups and (c) quality control criteria to distinguish variant calling artefacts or heteroplasmic positions from real sample contamination.

Three different scenarios need to be considered for contamination detection based on the mitochondrial phylogeny. First, two components branch into two different nodes: a major component with heteroplasmy level  $x$  and a minor component with heteroplasmy level  $1-x$  (Figure 1A). Here, H1a1 represents the Last Common Ancestor (LCA) for both components. Second, if heteroplasmic sites are only identified in the major component, the minor component H1a1 is defined as the LCA (Figure 1B). Third, if heteroplasmic sites are only present in the minor component, the major component H1a1 defines the LCA (Figure 1C).

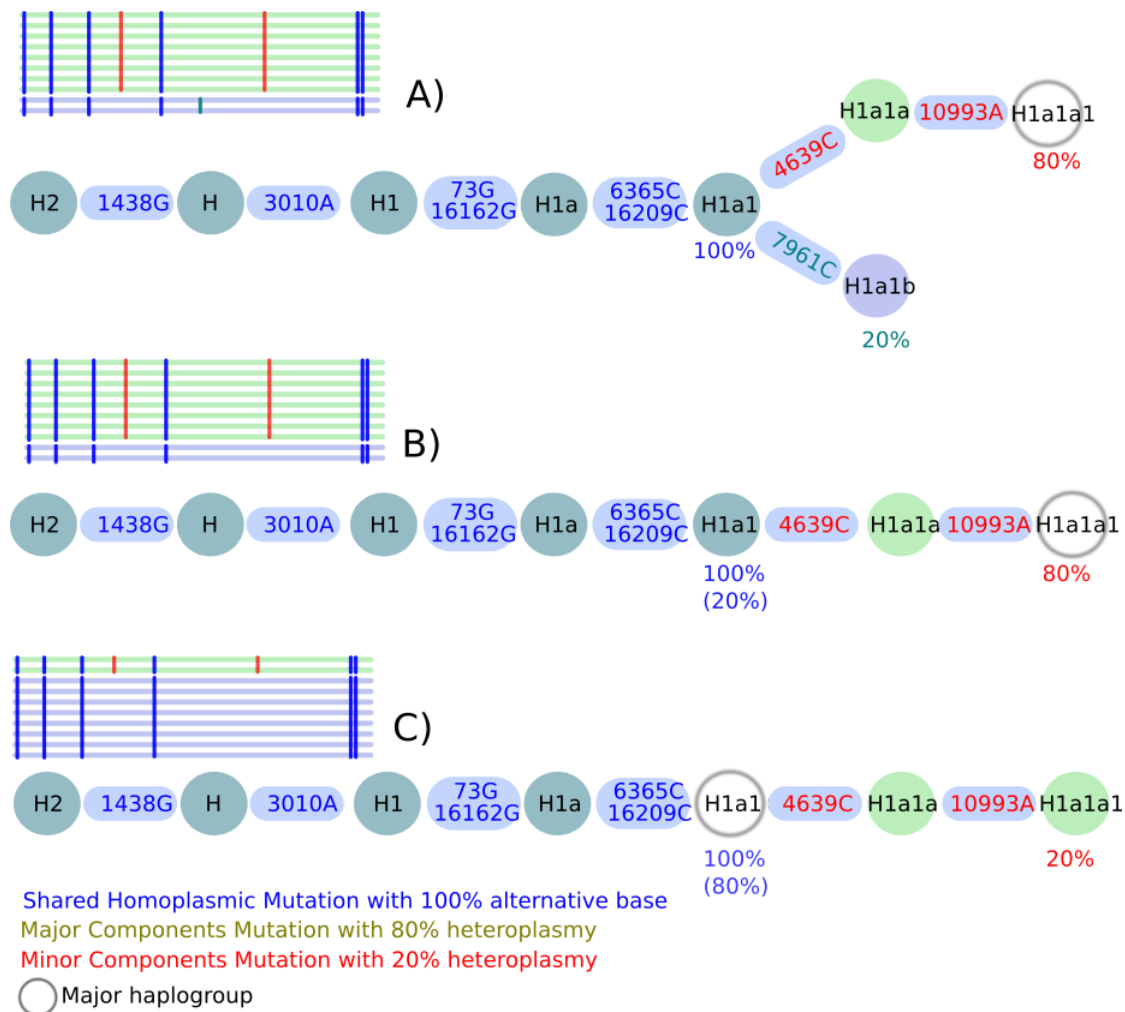

**Figure 1:** All possible contamination scenarios. Here, a contamination level of 20% is shown in all three scenarios A) to C). Shared polymorphisms of two haplotypes are included in a single branch, whereas the split into two branches displays the different lineage components. **A)** Shared mutations defining H1a1 (Last Common Ancestor, LCA) are present at 100%, while 7961C is present only at 20% defining the minor haplogroup H1a1b, whereas 4639C and 10993A is present at 80% defining the major haplogroup H1a1a1. **B)** A mixture of two haplotypes within a single lineage but of different lineage depths (minor component H1a1 and major component H1a1a1) is observed if no minor component can be found. **C)** A mixture of two haplotypes within a single lineage but of different lineage depths (minor H1a1a1 and major H1a1) is observed if the minor component results in a haplogroup. Shared homoplasmic sites facilitate the identification of the branching pattern in all three scenarios and improving the overall haplogroup quality.

## Homoplasmic and Heteroplasmic Variant Calling

The overall performance of haplocheck relies on an accurate homoplasmic and heteroplasmic variant calling. Therefore, we previously developed mtDNA-Server (Weissensteiner et al. 2016) that allows to detect heteroplasmic positions accurately down to 1%. We re-implemented mtDNA-Server as a standalone module (mutserve, <https://github.com/seppinho/mutserve>) and integrated it into the haplocheck workflow. To detect heteroplasmic positions accurately, several quality criteria (e.g. check for strand bias (Guo et al. 2012)) and a Maximum Likelihood (ML) heteroplasmy model has been applied that takes the sequencing error per base into account (Ye et al. 2014). All sites with a log likelihood ratio (LLR) of  $\geq 5$  are tagged as heteroplasmic sites. Detected heteroplasmic positions are reported in VCF format as heterozygous genotypes (GT) using the AF tag for the estimated contamination level. Although the term genotype makes sense in autosomal diploid scenarios, we use it here to refer to mtDNA variation patterns that resemble a genotype status.

For homoplasmic positions, the final genotype GT ( $\{A,C,G,T\}$ ) is detected using all input reads (reads) and calculating the genotype probability  $P$  using Bayes' Theorem  $P(\text{GT}|\text{reads}) = P(\text{reads}|\text{GT}) \times P(\text{GT}) / P(\text{reads})$ . To calculate the prior probability  $P(\text{GT})$ , we used the 1000 Genomes Phase 3 VCF file and calculated the frequencies for all sites using vcfTools (Danecek et al. 2011). To compute  $P(\text{reads}|\text{GT})$ , we calculate the sequence error rate ( $e_i = 10^{-Q_i/10}$ ) for each base  $i$  of a read, whereas  $Q$  is the reported quality value. For each genotype GT ( $\text{GT} \in \{A,C,G,T\}$ ) of a read, we determine the genotype likelihood by multiplying  $1 - e_i$  in case the base of the read  $r_i = \text{GT}$  and  $e_i/3$  otherwise over all reads (Ding et al. 2015). The denominator  $P(\text{reads})$  is the sum of all four  $P(\text{reads}|\text{GT})$ .

## Contamination Detection Model

The contamination model within haplocheck includes steps for (a) splitting the profile into two components, (b) haplogroup classification for each component, and (c) applying several quality-control criteria. Within the split step, homozygous genotypes for the alternate alleles (ALT; i.e. homoplasmic sites) are added to both components and heterozygous genotypes (i.e. heteroplasmic sites) are split using the AF tag. Since mutserve always reports the AF of the non-reference allele, the split method applies the following rule: In case a GT 0/1 (e.g. Ref: G,

ALT: C) with an AF of 0.20 is included, the split method defines C as the minor allele, 0.2 as the minor level and 0.8 as the major level. In case a GT 0/1 (e.g. Ref: G, ALT: C) with an AF of 0.80 is included, the C defines the major allele. If no reference allele is included (e.g. 1/2), we use the first allele as the major allele and assign the included AF to that allele.

For haplogroup classification, we use HaploGrep2 (Weissensteiner et al. 2016b) based on Phylotree 17 (van Oven and Kayser 2009), which has been refactored as a module and integrated directly into haplocheck. As a result, Haplogrep2 reports the haplogroup of both the major component and of the minor component. For each analyzed sample, the LCA is calculated, which is required to estimate the final contamination level and to calculate the distance between the two components. Therefore, we traverse Phylotree from the rCRS reference to each node. The LCA is determined by starting at the final node of component 1 (c1) and by iterating back until the reference (rCRS) is reached. Then, we iterate back to rCRS for component 2 (c2) until the first node included in c1 has been identified. This node then defines the LCA of both components. The contamination level is estimated by the AF of the detected heteroplasmic sites starting from the LCA. Only heteroplasmic positions showing a phylogenetic weight  $>5$  are included. The phylogenetic weight describes the frequency of each mutation in Phylotree and is scaled from 1 to 10 in a non-linear way. SNPs with a high occurrence in Phylotree are assigned a small phylogenetic weight. Furthermore, back mutations (mutation changes back to the rCRS reference within a specific haplogroup) and deletions on heteroplasmic sites are ignored by haplocheck.

Using all previous information, we finally estimate the contamination level for samples fulfilling the following three quality control criteria: (a)  $\geq 2$  heteroplasmic variants included (starting from the LCA), (b)  $\geq 0.5$  haplogroup quality (calculated by HaploGrep2 using the Kulczynski metric) and (c) phylogenetic distance between both components of  $\geq 2$ .

## Results

Haplocheck detects contamination by using the mitochondrial phylogeny and consists of several workflow steps for variant calling, haplogroup classification and contamination detection. It can be either used as a standalone line tool or as a cloud web service. For both scenarios, the same workflow is applied and a HTML report is generated that can be shared with collaborators. The Cloudfuge framework (Schönherr et al. 2012) has been utilized to provide the workflow

as-a-service to users, which was also used for large-scale genetic services like the Michigan Imputation Server (Das et al. 2016) and the mtDNA-Server (Weissensteiner et al. 2016).

## Workflow

### Input Validation

Haplocheck accepts mtDNA input data in CRAM/BAM or VCF format. Integrity checks are performed to verify that the uploaded files are valid and include all the required information. If all input samples pass the validation step (i.e. valid files, BAM aligned to rCRS, VCF includes GT and AF tags), the subsequent steps are performed.

### Variant Calling

Next, mutserve is automatically performed on each sample, applying by default filters for mapping quality (>20), base quality (>20) and alignment quality (>30). For usage within haplocheck, BAQ (Li 2011) has been disabled and the probability models applied. We also encourage users to mark duplicates in advance.

### Contamination Detection

For contamination detection, a VCF file that has been either created by mutserve or any other variant caller is required. Heteroplasmic sites must be coded as heterozygous genotypes (GT) and must use the allele frequency tag (AF) for reporting the heteroplasmic level. The AF tag allows haplocheck to split the heteroplasmic sites into two components.

### Report

Haplocheck reports the contamination result as a tab-delimited text file and as an HTML report. For each sample, haplocheck determines the final contamination status (yes/no), the mitochondrial contamination level and the mitochondrial coverage. Additionally, a graphical phylogenetic tree is generated dynamically for each sample, including the path from the rCRS to the two final components. This allows the user to manually inspect edge cases, visualize the contamination graphically or analyze the source of contamination (see Supplemental Figure S1).

## Evaluation

To test the performance of haplocheck within mtDNA and WGS studies we created several data sets. In a first step, we created wet-lab mixtures of two mitochondrial samples to validate the



variant calling with mutserve (Kloss-Brandstätter et al. 2015; Weissensteiner et al. 2016). The mixtures were as follows: M1 - 1:2 (50%), M2 - 1:10 (10%), M3 - 1:50 (2%), M4 - 1:100 (1%), M5 - 1:200 (0.5%, created in-silico). All mixtures and the two initial samples have been then sequenced on an Illumina HiSeq system. We analyzed the original samples (coverage 60,000x) and downsampled them accordingly. Table 1 summarizes our findings and shows the required coverage for each level.

| Coverage | Mixtures |          |         |         |           |
|----------|----------|----------|---------|---------|-----------|
|          | M1 (50%) | M2 (10%) | M3 (2%) | M4 (1%) | M5 (0.5%) |
| 60,000   | 0.464    | 0.126    | 0.023   | 0.011   | 0.006     |
| 30,000   | 0.463    | 0.121    | 0.023   | 0.011   | 0.006     |
| 6,000    | 0.462    | 0.118    | 0.023   | 0.011   | 0.006     |
| 3,000    | 0.462    | 0.115    | 0.025   | 0.011   | 0.006     |
| 2,500    | 0.465    | 0.114    | 0.026   | 0.011   | 0.006     |
| 2,000    | 0.463    | 0.109    | 0.024   | 0.011   | 0.007     |
| 1,800    | 0.464    | 0.111    | 0.025   | 0.012   | 0.007     |
| 1,500    | 0.467*   | 0.116    | 0.025   | 0.012   | n/a       |
| 1,200    | 0.464    | 0.113    | 0.025   | 0.012   | n/a       |
| 900      | 0.461    | 0.106    | 0.031   | 0.013   | n/a       |
| 600      | 0.458    | 0.106    | 0.030   | 0.012*  | n/a       |
| 300      | 0.454*   | 0.100    | 0.034*  | n/a     | n/a       |
| 120      | 0.447*   | 0.113    | n/a     | n/a     | n/a       |
| 60       | 0.439*   | 0.143*   | n/a     | n/a     | n/a       |

**Table 1:** Four wet-lab mixtures (M1-M4) and 1 in-silico mixture (M5) have been analyzed using haplocheck with varying coverage. The columns "M1-M5" indicate the mixture levels and the "Coverage" column indicates the downsampled coverage. Each cell in the table includes either the actual detected contamination level reported by haplocheck or n/a in case the contamination could not be detected by haplocheck. The asterisk (\*) indicates that the expected haplogroups were not found by haplocheck, since not all SNPs were detected.

We further generated NGS data starting from FASTA sequences (Huang et al. 2012), and simulated both different mixture levels (0.5%, 0.7%, 1%, 2%, 3% and 5%) and coverage values

(between 5,000x and 100x). The results were highly concordant with the wet-lab mixtures presented in Table 1 (see Supplemental Table S1).

In a second step, we evaluated the performance of haplocheck compared to VerifyBamID2 by creating whole-genome in-silico mixtures. Therefore, we generated four in-silico samples from two random 1000 Genomes samples, each consisting of four different mixtures between 0.5% - 10%. To analyze the impact of the mitochondrial copy number (mtCN), samples with different amounts of mtCN were chosen from the 1000 Genomes Project. Table 2 summarizes the findings, whereby each cell in the table includes the average delta between the calculated and the real value for all four different mixtures per sample (see also Supplemental Table S2). Values obtained from VerifyBamID2 and haplocheck correlate if the copy number (CN) for each component in the mixture is similar (1:1 and 1:0.8). Values obtained from mixture 3 (10:1) still correlate, since the main component shows a higher mtCN and is therefore unaffected by the lower mtCN of component 2. In a worst-case scenario (mixture 4, 1:10), where the main component has a lower mtCN and the minor component a higher mtCN, the values between haplocheck and VerifyBamID2 differ substantially.

|                  | mtCN Ratio | VerifyBamID2 |          |            |           | Haplocheck   |
|------------------|------------|--------------|----------|------------|-----------|--------------|
|                  |            | HGPD_100K    | HGPD_10K | 1000G_100K | 1000G_10K | Phylotree 17 |
| <b>Mixture 1</b> | 1:1        | -0.85%       | -0.51%   | -0.34%     | 0.11%     | 0.45%        |
| <b>Mixture 2</b> | 1:0.8      | -0.26%       | -0.08%   | -0.49%     | -0.12%    | 1.32%        |
| <b>Mixture 3</b> | 10:1       | -0.66%       | -0.66%   | -0.50%     | -0.61%    | -3.70%       |
| <b>Mixture 4</b> | 1:10       | -0.03%       | -0.06%   | -0.22%     | -0.36%    | 20.85%       |

**Table 2:** Four different mixtures have been created and the average delta between expected and calculated contamination level reported. Each average delta consists of four different mixtures (1-10%) and has been calculated for VerifyBamID2 using a different set of markers as well as haplocheck. Haplocheck works well as a proxy for the first three sample mixtures, but differs as expected in substantially uneven mtCN between the main component (low mtCN) and the second component (high mtCN).

Nevertheless, such a drastic shift in the copy number is atypical for an NGS sequencing project. In (Zhang et al. 2017) the copy number of 1,500 women (age 17-85) have been analyzed and show that most samples ranging from 100 - 300 (mean 169, DNA source whole-blood). In (Fazzini et al. 2019) the mtCN has been analysed in a cohort of 4,812 chronic kidney disease

patients showing also only moderate differences (mean 107.2, sd 36.4, DNA source whole-blood).

In a third step, we created and analyzed in-silico data by mixing random genotype profiles from the currently best available mtDNA phylogeny derived from Phylotree Build 17. The overall performance of haplocheck heavily depends on a good classification of samples into haplogroups even from noisy variant calling data sets. We initially created input profiles for each displayed haplogroup, amounting to 5,426 profiles in total. Each input profile consists of a list of polymorphisms from the tree reference (rCRS) to the actual node (or haplogroup). Our test data consists of 500,000 unique mixtures of pairwise haplogroup profiles derived from the overall phylogeny comprising of 5,500 haplogroups (250,000 contaminated, 250,000 not-contaminated samples) and 100,000 mixtures from the haplogroup H-subtree, including 977 haplogroups. The generation of in-silico data from the H-subtree allows us to test the performance of samples showing a smaller phylogenetic distance.

To account for noisy input data, we artificially created random single nucleotide polymorphisms (SNPs) to each input profile. This has been done by removing expected SNPs from the input profile and adding random SNPs available within Phylotree. The amount of noise varies from 0 - 8 SNPs for each mixture. The proportion of added *versus* removed SNPs is calculated randomly. To make it further restrictive, we only added phylogenetic relevant SNPs from Phylotree. SNPs that are not present in Phylotree (i.e. SNPs so far unknown in the phylogeny) would not affect the contamination estimation. Finally, 3 datasets (noise 0, 4, 8) derived from 2 different trees (complete tree, haplogroup H subtree) have been generated, each consisting of 500,000 and 100,000 mixtures respectively. F1-Score (defined as  $(2 \times \text{precision} \times \text{sensitivity}) / (\text{precision} + \text{sensitivity})$ ) has been calculated for each mixture to analyze the overall accuracy of haplocheck.

To determine the best haplocheck configuration regarding accuracy, we tested different setups for all 6 datasets. Each setup includes a different threshold for (1) the amount of major and minor heteroplasmic sites, (2) the minimum allowed phylogenetic distance between two profiles and (3) the haplogroup classification model (Kulczynski, Hamming, Jaccard). Figure 2 summarizes the 6 best setups that have been tested to determine the optimal trade-off between noise, haplogroup distance and the overall F1-Score. In our experiments, Setup 3 shows the best trade-off between haplogroup distance and overall accuracy. This setup allows us to detect contamination of samples with a phylogenetic distance of at least 2 and has been used as the final setup for the contamination method.

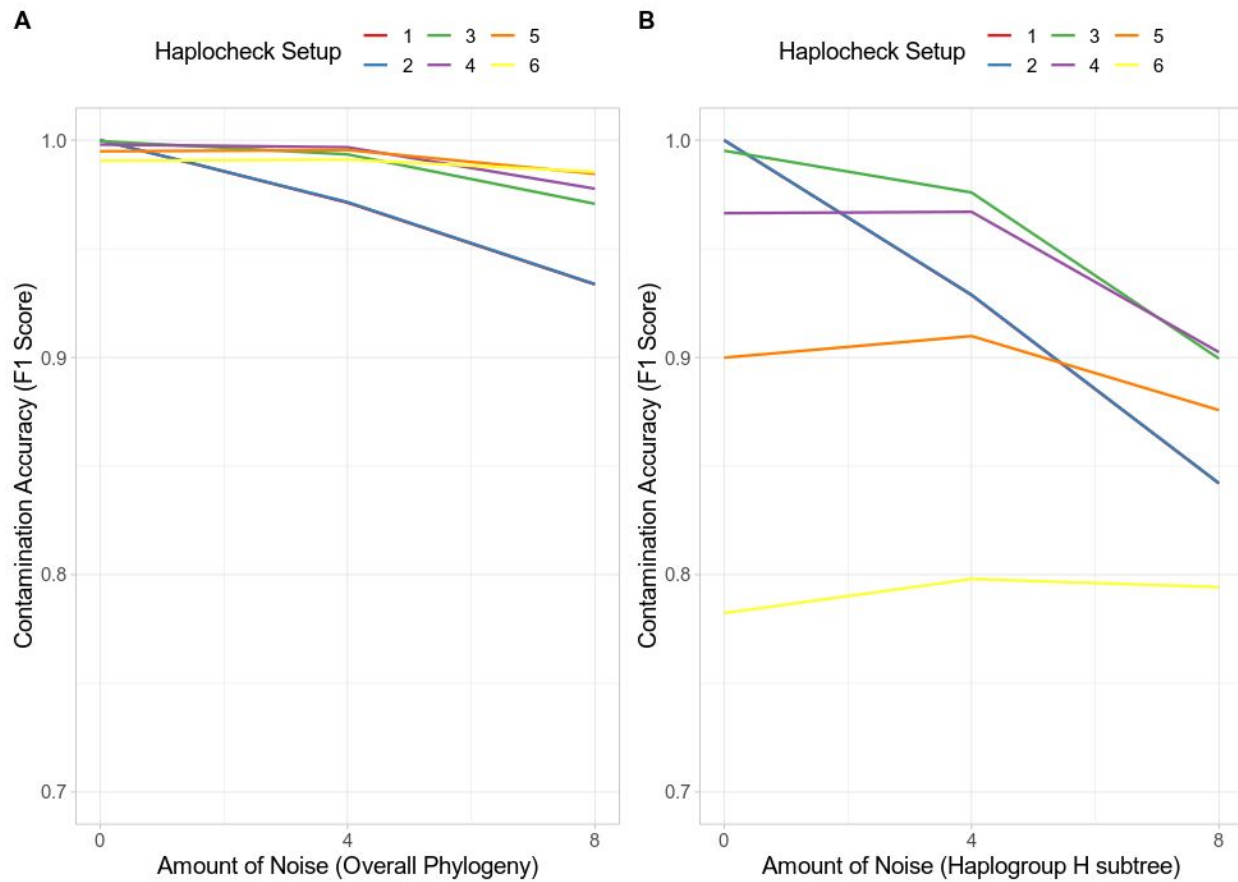

**Figure 2:** Tested haplocheck setups (=lines) to determine the best trade-off between noise and overall accuracy. Setup 3 (phylogenetic distance  $\geq 2$ , amount of heteroplasmic sites  $\geq 2$ , haplogroup quality  $> 0.5$ , Kulczynski Metric) shows the best trade-off for all 6 datasets. Each dataset consists of 500.000 mixtures (Overall Phylogeny) and 100.000 mixtures (Haplogroup H subtree) respectively. The x-axis includes the amount of noise, the y-axis the calculated F1-Score (scale from 0 to 1, where 1 equates to a perfect precision and recall).

Table 3 summarizes the F1 Score statistics for Setup 3. The result demonstrates that haplocheck is able to accurately detect contamination of two samples also in the case where noise is included in the input profiles and the distance between the two haplogroups is small.

| <b>In-Silico Simulation</b>                                |                |                |                |
|------------------------------------------------------------|----------------|----------------|----------------|
| Setup 3: Distance: 2; Heteroplasmies: 2, Kulczynski Metric |                |                |                |
| <b>Metric</b>                                              | <b>Noise 0</b> | <b>Noise 4</b> | <b>Noise 8</b> |
| F1 Score Complete Phylogenetic Tree                        | 0.999          | 0.993          | 0.971          |
| F1 Score H Phylogenetic Tree                               | 0.995          | 0.976          | 0.899          |

**Table 3:** F1 Score for different noise categories using the finally chosen Setup 3. Noise 0 - Noise 8 includes the amount of added / removed SNPs from the input profile. The two experiments based on different trees (mixtures derived from the complete phylogenetic tree and mixtures derived from the haplogroup H subtree only) show that haplocheck is capable of detecting contamination accurately.

## Analyzing 1000 Genomes Project Phase 3

To evaluate haplocheck on a WGS study, we extracted the mtDNA genome reads (labeled as chromosome MT) from the 1000 Genomes Project<sup>1</sup> (Phase 3), resulting in a sample size of 2,504 and a total file size of 95 GB. As an initial check, we compared variants detected by mutserve to the official 1000 Genomes data release using callMom (<https://github.com/juansearch/callMom>) and determined the haplogroup using HaploGrep2. Overall, 98 % of the samples (n = 2,504) result in an identical haplogroup (See Supplemental Figure S2). The downloaded BAM files have then been used as an input for haplocheck to test for contamination. Based on the mitochondrial genome, 4.75% (119 of 2,504) of all samples show signs of contamination on mtDNA > 1% (see Supplemental Table S3). Please note, that the 1000 Genomes Project only excluded samples with a contamination level > 3% (by using VerifyBamID). Since the performance of haplocheck as a proxy for nDNA is dependent on the mtCN, we also looked at the tissue source used for DNA extraction. As depicted in Table 4 and

<sup>1</sup> <ftp://ftp.1000genomes.ebi.ac.uk/vol1/ftp/phase3/>

Supplemental Figure 3, there is a significant difference in the mtCN of the two different tissue types that have been used ( $p < 2.2e-16$  using an independent t-test). The mtCN has been inferred using the nDNA and mtDNA coverage (mtDNA coverage / nDNA coverage x 2) (Ding et al. 2015).

|                                   | Tissue Cell Type |             |                       |
|-----------------------------------|------------------|-------------|-----------------------|
|                                   | Blood            | LCL         | Not specified         |
| All Samples                       |                  |             |                       |
| Number of Samples                 | 364 (14.5%)      | 506 (20.2%) | 1634 (65.3%)          |
| Contaminated Samples (Haplocheck) |                  |             |                       |
| Number of Samples                 | 39 (32.8%)       | 10 (8.4%)   | 70 (58.8%)            |
| Mean of mtCN                      | 51.07            | 745.58      | <i>Not determined</i> |

**Table 4** - Tissue Cell Types of all 2,504 samples from the 1000 Genomes Project. Significant differences in the mitochondrial copy number (mtCN) between 1000G samples can be seen. Each cell includes the absolute and relative number of samples. LCL: lymphoblastoid cell lines.

Due to the different mtCN, we split our results into two groups (low mtCN and high mtCN) and calculated the Pearson correlation coefficient (R) separately. Group 1 (mtCN mean of 746) shows a correlation of  $R = 0.75$  between VerifyBamID and haplocheck and the contamination levels reported by haplocheck are ranging from 0.9% to 4.8% (see Supplemental Table 4). Group 2 (mtCN mean of 51) shows a correlation of  $R = 0.25$  and contamination levels reported by haplocheck are between 1% - 24.6 % (see Supplemental Table 5).

In general, samples with a higher mtCN (group 1) are less vulnerable to level differences between nDNA and mtDNA. Therefore, mtDNA contamination levels are in a very similar range compared to those observed by VerifyBamID. Samples with a lower mtCN (group 2) are more vulnerable to mtCN differences. This is due to the fact that a contamination with a sample showing a higher amount of mtCN can affect the contamination level substantially. Therefore, group 2 shows a higher discrepancy in the contamination level compared to VerifyBamID.

As mentioned earlier, such a drastic shift in the copy number is atypical for an NGS sequencing project. For studies showing only moderate differences in the mtCN, haplocheck can be used as an efficient nDNA proxy. For studies showing a wider range of mtCN, the mtDNA level might differ from the reported nDNA level.

In the last step, we looked at samples that have been excluded from the 1000 Genomes Project (nDNA contamination level >3%). In total, 4 samples have been excluded by VerifyBamID due to a high free mix (sequence-only estimate of contamination) and 8 samples due to a high chip mix (for estimating contamination or swap using sequence+array method). Haplocheck was able to identify these samples as contaminated ( $R=0.89$ , see Supplemental Table S6).

## Nuclear DNA of mitochondrial origin

Nuclear DNA of mitochondrial origin (NUMTS) can either result in (a) a coverage drop on mtDNA sites due to the alignment of mitochondrial reads to NUMTS or (b) false positive heteroplasmy calls due to the alignment of NUMT reads to the mitochondrial genome (Maude et al. 2019). Approaches exist (Goto et al. 2011; Samuels et al. 2013) that exclude reads mapping to the nDNA but overall reduce coverage and may result in false negatives (Albayrak et al. 2016). In (Weissensteiner et al. 2016), we annotated mitochondrial sites coming from an NUMTS reference database (Li et al. 2012; Dayama et al. 2014), although limited to known NUMTS. For contamination detection with haplocheck, false positive heteroplasmic sites due to NUMTS are expected to only have a minor effect since they typically do not resemble the complete mitochondrial haplotypes. Nevertheless, sufficient coverage for the haplogroup defining SNPs is still required when dealing with NUMTS. In a study conducted by (Maude et al. 2019), an in-silico model has been set up to analyze the homology between mitochondrial variants and NUMTS. They show that 29 SNPs representing haplogroups A, H, L2, M, and U did not cause loss of coverage, nevertheless substantial loss of coverage has been identified for specific sites (e.g.G1888A, A4769G). Furthermore, (Balciuniene and Balciunas 2019) described the presence of a mega-NUMT that could mimic contamination on mitochondrial haplogroup level. This indicates that in very rare cases, NUMTs could indeed resemble complete mitochondrial haplotypes and yield to a false positive contamination result (Salas et al. 2020; Wei et al. 2020). While we did not observe NUMT-related issues in the validation of the 1000 Genome Project, we can not entirely rule out eventual NUMTs effects on contamination detection.

## Runtime and Performance

Haplocheck consists of several independent workflow steps. The most intensive computational workflow step is the variant calling step. Table 5 shows that our pipeline starting from BAM data scales linearly with the data size (i.e. sequence reads). For the complete 1000 Genomes Project data, the contamination estimate has been calculated within 8 hours and 58 minutes starting from BAM using a single core (Intel Xeon CPU 2.30GHz) and 2 GB of RAM.

| Runtime Haplocheck | File Size             |
|--------------------|-----------------------|
| 1 min 49 sec       | 0.19 GB               |
| 2 min 58 sec       | 0.37 GB               |
| 15 min 55 sec      | 1.85 GB               |
| 31 min 26 sec      | 3.7 GB                |
| 8 h 58 min         | 95 GB (2,504 samples) |

**Table 5** - Haplocheck v1.1.0 runtime for different BAM files. Runtime includes variant calling (using mutserve) and contamination detection. Haplocheck scales with the amount of reads. All tests have been executed using a single core (Intel Xeon Processor E5-2650 v3) and 2 GB of RAM.



Table 6 includes a runtime comparison for 26 samples of VerifyBamID2 (input WGS data, varying amounts of markers and cores) with haplocheck (input mtDNA) starting from BAM data.

|                  | <b>Haplocheck</b>                  | <b>VerifyBamID2</b>            |                                 |
|------------------|------------------------------------|--------------------------------|---------------------------------|
| <b># Samples</b> | <b>Phylotree 17<br/>(1 thread)</b> | <b>1KP3 10k<br/>(1 thread)</b> | <b>1KP3 100k<br/>(1 thread)</b> |
| 26 samples       | 2 min                              | 2h 12 min                      | 4h 33 min                       |

**Table 6** - Haplocheck v1.0.11 runtime for 26 samples of the 1000 Genomes Project data. For haplocheck, runtime includes variant calling with mutserve and contamination detection. For VerifyBamID2, all autosomes have been analyzed with different sets of markers (10k and 100k), therefore resulting in a much larger data size. All tests have been executed on an Intel Xeon Processor E5-2650 v3 CPU using OpenJDK 8.

## Contamination Source

Haplocheck always reports both the major and minor haplotypes for each sample. Therefore, possible sources of contamination can be investigated. For example, sample HG00740 from the 1000 Genomes Project shows a contamination level of 2.74% on nDNA (using VerifyBamID2) and 3% on mtDNA (using haplocheck). By looking at the phylogenetic tree that is created for each sample by haplocheck, the contaminating minor haplogroup B2b3a can be identified. The identical haplogroup is also assigned to sample HG01079 that has been analyzed in the same center with a similar mitochondrial copy number. Such phylogenetic information provided within the interactive HTML report can help in identifying the source of contamination for all three types of contamination.

## Discussion

There are many examples in the literature showing the negative impact of artefacts on mtDNA datasets in different areas of research, including medical studies, forensic genetics and human population studies (Bandelt and Salas 2012; He et al. 2010; Ye et al. 2014; Just et al. 2014a). The described approach in this paper takes advantage of the mitochondrial phylogeny and is capable of detecting contamination based on mitochondrial haplotype mixtures. By creating several in-silico data sets and analyzing the 1000 Genomes Project data we show that haplocheck can be used in both targeted mtDNA sequencing studies and WGS studies. We

also investigated the influence of the mitochondrial copy number (mtCN) and showed that it is the critical component when comparing mtDNA to nDNA levels.

Several other methods for contamination detection exist. For nDNA sequences, VerifyBamID2 (Zhang et al. 2020) offers an ancestry-agnostic DNA contamination estimation method and is widely used in WGS studies. Schmutzi (Renaud et al. 2015) provides a contamination estimation tool appropriate for ancient mtDNA. A further approach was suggested in (Dickins et al. 2014), describing a pipeline for contamination detection accessible through the Galaxy online platform (Afgan et al. 2018).

We also identified limitations with the proposed phylogenetic based contamination check in this paper, previously applied in a semi-automatic manner (Avital et al. 2012; Li et al. 2010). There is currently a publication bias in favor of the European mtDNA haplogroups that provides the most phylogenetic details, whereas especially African haplogroups are underrepresented (626 African haplogroups compared to 2,546 European haplogroups in Phylotree 17). While the major changes in the phylogeny were performed during the initial growing process of the tree, the last few years showed only refinements of lineages and branches. Therefore, major changes are no longer expected in the human phylogeny, but data from upcoming sequencing studies will help to refine existing groups. As a further limitation, contamination detection based on mitochondrial genomes is limited in scenarios where samples belong to the same maternal line (e.g. mother-offspring). If a contamination between mother and child exists, the presented approach is unable to detect it. A further limitation for WGS studies are possible differences between the reported mtDNA level and nDNA level due to the mtCN.

Overall, we demonstrated that haplogroup-based analysis as carried out by haplocheck can be used systematically as a quality measure for mtDNA data. Such kind of analysis could become effective prior to data interpretation and publication of mtDNA sequencing projects. Additionally, haplocheck proves to be useful in WGS studies as a fast proxy tool for estimating the nDNA contamination level.

## Software Availability

Haplocheck is available at <https://github.com/genepi/haplocheck> under the MIT license and requires Java 8 or higher for local execution. All generated data, scripts and reports are available within this repository. The web service can be accessed via <https://mitoverse.i-med.ac.at>.

## Acknowledgements

We would like to acknowledge the support of the IT Department from the Medical University of Innsbruck (especially Mario Bedenk, Michael Hoertnagl, Matthias Tschugg and Christoph Wild) for providing technical support and cloud resources for mitoverse.

## Author Contributions

HW, SeS, LuF and LiF devised the project. SeS and HW implemented the software. LuF developed Cloudbene. SeS, HW, AK and LiF wrote the manuscript. FK and AS supervised the project and contributed to the manuscript. All authors read and approved the final manuscript.

## Disclosure Declaration

The authors declare that they have no competing interests.

## References

- 1000 Genomes Project Consortium, Auton A, Brooks LD, Durbin RM, Garrison EP, Kang HM, Korbel JO, Marchini JL, McCarthy S, McVean GA, et al. 2015. A global reference for human genetic variation. *Nature* **526**: 68–74.
- Afgan E, Baker D, Batut B, van den Beek M, Bouvier D, Čech M, Chilton J, Clements D, Coraor N, Grüning BA, et al. 2018. The Galaxy platform for accessible, reproducible and collaborative biomedical analyses: 2018 update. *Nucleic Acids Research* **46**: W537–W544. <http://dx.doi.org/10.1093/nar/gky379>.
- Albayrak L, Khanipov K, Pimenova M, Golovko G, Rojas M, Pavlidis I, Chumakov S, Aguilar G, Chávez A, Widger WR, et al. 2016. The ability of human nuclear DNA to cause false positive low-abundance heteroplasmy calls varies across the mitochondrial genome. *BMC Genomics* **17**: 1017.

- Andrews RM, Kubacka I, Chinnery PF, Lightowlers RN, Turnbull DM, Howell N. 1999. Reanalysis and revision of the Cambridge reference sequence for human mitochondrial DNA. *Nat Genet* **23**: 147.
- Avital G, Buchshtav M, Zhidkov I, Tuval Feder J, Dadon S, Rubin E, Glass D, Spector TD, Mishmar D. 2012. Mitochondrial DNA heteroplasmy in diabetes and normal adults: role of acquired and inherited mutational patterns in twins. *Hum Mol Genet* **21**: 4214–4224.
- Balciuniene J, Balciunas D. 2019. A Nuclear mtDNA Concatemer (Mega-NUMT) Could Mimic Paternal Inheritance of Mitochondrial Genome. *Front Genet* **10**: 518.
- Bandelt H-J, Salas A. 2012. Current Next Generation Sequencing technology may not meet forensic standards. *Forensic Science International: Genetics* **6**: 143–145.  
<http://dx.doi.org/10.1016/j.fsigen.2011.04.004>.
- Bandelt HJ, Salas A, Lutz-Bonengel S. 2004. Artificial recombination in forensic mtDNA population databases. *Int J Legal Med* **118**: 267–273.
- Brandhagen MD, Just RS, Irwin JA. 2020. Validation of NGS for mitochondrial DNA casework at the FBI Laboratory. *Forensic Sci Int Genet* **44**: 102151.
- Danecek P, Auton A, Abecasis G, Albers CA, Banks E, DePristo MA, Handsaker RE, Lunter G, Marth GT, Sherry ST, et al. 2011. The variant call format and VCFtools. *Bioinformatics* **27**: 2156–2158.
- Das S, Forer L, Schönherr S, Sidore C, Locke AE, Kwong A, Vrieze SI, Chew EY, Levy S, McGue M, et al. 2016. Next-generation genotype imputation service and methods. *Nat Genet* **48**: 1284–1287.
- Dayama G, Emery SB, Kidd JM, Mills RE. 2014. The genomic landscape of polymorphic human nuclear mitochondrial insertions. *Nucleic Acids Res* **42**: 12640–12649.
- Dickins B, Rebolledo-Jaramillo B, Su MS-W, Paul IM, Blankenberg D, Stoler N, Makova KD, Nekrutenko A. 2014. Controlling for contamination in re-sequencing studies with a reproducible web-based phylogenetic approach. *Biotechniques* **56**: 134–141.
- Ding J, Sidore C, Butler TJ, Wing MK, Qian Y, Meirelles O, Busonero F, Tsoi LC, Maschio A,

- Angius A, et al. 2015. Assessing Mitochondrial DNA Variation and Copy Number in Lymphocytes of ~2,000 Sardinians Using Tailored Sequencing Analysis Tools. *PLoS Genet* **11**: e1005306.
- Fazzini F, Lamina C, Fendt L, Schultheiss UT, Kotsis F, Hicks AA, Meiselbach H, Weissensteiner H, Forer L, Krane V, et al. 2019. Mitochondrial DNA copy number is associated with mortality and infections in a large cohort of patients with chronic kidney disease. *Kidney Int* **96**: 480–488.
- Goto H, Dickins B, Afgan E, Paul IM, Taylor J, Makova KD, Nekrutenko A. 2011. Dynamics of mitochondrial heteroplasmy in three families investigated via a repeatable re-sequencing study. *Genome Biol* **12**: R59.
- Guo Y, Li J, Li C-I, Long J, Samuels DC, Shyr Y. 2012. The effect of strand bias in Illumina short-read sequencing data. *BMC Genomics* **13**: 666.
- He Y, Wu J, Dressman DC, Iacobuzio-Donahue C, Markowitz SD, Velculescu VE, Diaz LA Jr, Kinzler KW, Vogelstein B, Papadopoulos N. 2010. Heteroplasmic mitochondrial DNA mutations in normal and tumour cells. *Nature* **464**: 610–614.
- Huang W, Li L, Myers JR, Marth GT. 2012. ART: a next-generation sequencing read simulator. *Bioinformatics* **28**: 593–594.
- Jun G, Flickinger M, Hetrick KN, Romm JM, Doheny KF, Abecasis GR, Boehnke M, Kang HM. 2012. Detecting and estimating contamination of human DNA samples in sequencing and array-based genotype data. *Am J Hum Genet* **91**: 839–848.
- Just RS, Irwin JA, Parson W. 2015. Mitochondrial DNA heteroplasmy in the emerging field of massively parallel sequencing. *Forensic Sci Int Genet* **18**: 131–139.
- Just RS, Irwin JA, Parson W. 2014a. Questioning the prevalence and reliability of human mitochondrial DNA heteroplasmy from massively parallel sequencing data. *Proc Natl Acad Sci U S A* **111**: E4546–7.
- Just RS, Irwin JA, Parson W. 2014b. Questioning the prevalence and reliability of human mitochondrial DNA heteroplasmy from massively parallel sequencing data. *Proc Natl Acad*

*Sci U S A* **111**: E4546–7.

Kivisild T, Metspalu M, Bandelt H-J, Richards M, Villems R. 2006. The World mtDNA Phylogeny. *Nucleic Acids and Molecular Biology* 149–179. [http://dx.doi.org/10.1007/3-540-31789-9\\_7](http://dx.doi.org/10.1007/3-540-31789-9_7).

Kloss-Brandstätter A, Pacher D, Schönherr S. 2011. HaploGrep: a fast and reliable algorithm for automatic classification of mitochondrial DNA haplogroups. *Human*. <http://onlinelibrary.wiley.com/doi/10.1002/humu.21382/full>.

Kloss-Brandstätter A, Weissensteiner H, Erhart G, Schäfer G, Forer L, Schönherr S, Pacher D, Seifarth C, Stöckl A, Fendt L, et al. 2015. Validation of Next-Generation Sequencing of Entire Mitochondrial Genomes and the Diversity of Mitochondrial DNA Mutations in Oral Squamous Cell Carcinoma. *PLoS One* **10**: e0135643.

Li H. 2011. Improving SNP discovery by base alignment quality. *Bioinformatics* **27**: 1157–1158. <http://dx.doi.org/10.1093/bioinformatics/btr076>.

Li M, Schönberg A, Schaefer M, Schroeder R, Nasidze I, Stoneking M. 2010. Detecting heteroplasmy from high-throughput sequencing of complete human mitochondrial DNA genomes. *Am J Hum Genet* **87**: 237–249.

Li M, Schröder R, Ni S, Madea B, Stoneking M. 2015. Extensive tissue-related and allele-related mtDNA heteroplasmy suggests positive selection for somatic mutations. *Proc Natl Acad Sci U S A* **112**: 2491–2496.

Li M, Schroeder R, Ko A, Stoneking M. 2012. Fidelity of capture-enrichment for mtDNA genome sequencing: influence of NUMTs. *Nucleic Acids Res* **40**: e137.

Maude H, Davidson M, Charitakis N, Diaz L, Bowers WHT, Gradovich E, Andrew T, Huntley D. 2019. NUMT Confounding Biases Mitochondrial Heteroplasmy Calls in Favor of the Reference Allele. *Front Cell Dev Biol* **7**: 201.

Renaud G, Slon V, Duggan AT, Kelso J. 2015. Schmutzi: estimation of contamination and endogenous mitochondrial consensus calling for ancient DNA. *Genome Biol* **16**: 224.

Salas A, Schönherr S, Bandelt HJ. 2020. Extraordinary claims require extraordinary evidence in asserted mtDNA biparental inheritance. *Forensic Sci*.

<https://www.sciencedirect.com/science/article/pii/S1872497320300454>.

Salas A, Yao Y-G, Macaulay V, Vega A, Carracedo A, Bandelt H-J. 2005. A critical reassessment of the role of mitochondria in tumorigenesis. *PLoS Med* **2**: e296.

Samuels DC, Han L, Li J, Quanghu S, Clark TA, Shyr Y, Guo Y. 2013. Finding the lost treasures in exome sequencing data. *Trends Genet* **29**: 593–599.

Schönherr S, Forer L, Weißensteiner H, Kronenberg F, Specht G, Kloss-Brandstätter A. 2012. Cloudgene: a graphical execution platform for MapReduce programs on private and public clouds. *BMC Bioinformatics* **13**: 200.

Vohr SH, Gordon R, Eizenga JM, Erlich HA, Calloway CD, Green RE. 2017. A phylogenetic approach for haplotype analysis of sequence data from complex mitochondrial mixtures. *Forensic Sci Int Genet* **30**: 93–105.

Weissensteiner H, Forer L, Fuchsberger C, Schöpf B, Kloss-Brandstätter A, Specht G, Kronenberg F, Schönherr S. 2016. mtDNA-Server: next-generation sequencing data analysis of human mitochondrial DNA in the cloud. *Nucleic Acids Res* **44**: W64–9.

Wei W, Pagnamenta AT, Gleadall N, Sanchis-Juan A, Stephens J, Broxholme J, Tuna S, Odhams CA, Genomics England Research Consortium, NIHR BioResource, et al. 2020. Nuclear-mitochondrial DNA segments resemble paternally inherited mitochondrial DNA in humans. *Nat Commun* **11**: 1740.

Wei W, Tuna S, Keogh MJ, Smith KR, Aitman TJ, Beales PL, Bennett DL, Gale DP, Bitner-Glindzicz MAK, Black GC, et al. 2019. Germline selection shapes human mitochondrial DNA diversity. *Science* **364**. <http://dx.doi.org/10.1126/science.aau6520>.

Yao Y-G, Bandelt H-J, Young NS. 2007. External contamination in single cell mtDNA analysis. *PLoS One* **2**: e681.

Ye K, Lu J, Ma F, Keinan A, Gu Z. 2014. Extensive pathogenicity of mitochondrial heteroplasmy in healthy human individuals. *Proc Natl Acad Sci U S A* **111**: 10654–10659.

Yin C, Liu Y, Guo X, Li D, Fang W, Yang J, Zhou F, Niu W, Jia Y, Yang H, et al. 2019. An Effective Strategy to Eliminate Inherent Cross-Contamination in mtDNA Next-Generation

Sequencing of Multiple Samples. *J Mol Diagn* **21**: 593–601.

Yuan Y, Ju YS, Kim Y, Li J, Wang Y, Yoon CJ, Yang Y, Martincorena I, Creighton CJ, Weinstein JN, et al. 2020. Comprehensive molecular characterization of mitochondrial genomes in human cancers. *Nat Genet* **52**: 342–352.

Zhang F, Flickinger M, Taliun SAG, InPSYght Psychiatric Genetics Consortium, Abecasis GR, Scott LJ, McCarroll SA, Pato CN, Boehnke M, Kang HM. 2020. Ancestry-agnostic estimation of DNA sample contamination from sequence reads. *Genome Res* **30**: 185–194.

Zhang R, Wang Y, Ye K, Picard M, Gu Z. 2017. Independent impacts of aging on mitochondrial DNA quantity and quality in humans. *BMC Genomics* **18**: 890.
